# Supplementary material for: Autonomous operation of 3D DNA walkers in living cells for microRNA imaging
Source: Royal Society of Chemistry journal article supplement (doi:10.1039/d0nr06651f), 2020-12-21
Supplement: d0nr06651f1.pdf [file d0nr06651f1.pdf]

**Supporting Information:**

**Autonomous Operation of 3D DNA Walkers in Living Cells for MicroRNA Imaging**

Hui Hu,<sup>§a</sup> Fu Zhou,<sup>§a</sup> Baojuan Wang,<sup>§b</sup> Xin Chang,<sup>b</sup> Tianyue Dai,<sup>a</sup> Ruifen Tian,<sup>a</sup> Yifei Wan,<sup>a</sup> Xiayan Wang,<sup>\*c</sup> Guangfeng Wang<sup>\*a</sup>

*a. Key Laboratory of Chem-Biosensing of Anhui Province; Key Laboratory of Functional Molecular Solids of Anhui Province; College of Chemistry and Materials Science, Anhui Normal University, Wuhu 241000, P. R. China. E-mail: wangyuz@mail.ahnu.edu.cn*

*b. Anhui Provincial Key Laboratory of Molecular Enzymology and Mechanism of Major Diseases and Key Laboratory of Biomedicine in Gene Diseases and Health of Anhui Higher Education Institutes, College of Life Sciences, Anhui Normal University, Wuhu 241000, Anhui, China*

*c. College of Environmental and Energy Engineering, Beijing University of Technology, Beijing 100124, China. E-mail: xiayanwang@bjut.edu.cn*

\*corresponding author

Xiayan Wang. E-mail: xiayanwang@bjut.edu.cn

Guangfeng Wang. E-mail: wangyuz@mail.ahnu.edu.cn

# Table of Content

|                                                       |            |
|-------------------------------------------------------|------------|
| <b>S1. Experimental Section</b> .....                 | <b>S-3</b> |
| Chemicals and Materials.....                          | S-3        |
| Apparatus .....                                       | S-3        |
| Preparation of AuNPs@ZIF-8.....                       | S-3        |
| Construction of the 3D DNA walker on AuNPs@ZIF-8..... | S-3        |
| Fluorescence Detection of miRNA-10b in Vitro .....    | S-4        |
| PAGE electrophoresis .....                            | S-4        |
| ICP-MS .....                                          | S-4        |
| Cell Culture .....                                    | S-4        |
| Cell Viability Assay .....                            | S-4        |
| Cell Staining and Imaging.....                        | S-4        |
| <br>                                                  |            |
| <b>S2. Figures and tables</b> .....                   | <b>S-5</b> |
| Figure S1-S3 .....                                    | S-5        |
| Figure S4-S7 .....                                    | S-6        |
| Figure S8-S11 .....                                   | S-7        |
| Figure S12 and Table S1 .....                         | S-8        |
| <br>                                                  |            |
| <b>S3. References</b> .....                           | <b>S-8</b> |



NaCl solution (2 M) was added into the solution for four times in the following 8 h to increase the salt concentration to 0.3 M. Furthermore, the superfluous DNA was separated by centrifuging the resulting solution (13000 rpm, 30 min) and then rinsed 3 times with 10 mM Tris-HCl (pH 7.4) containing 0.05% Tween 20. At last, AuNPs@ZIF-8 co-loaded with the substrate DNA and locker-DNAzyme was obtained, shortly named as DNA/AuNPs@ZIF-8.

**Fluorescence Detection of miRNA-10b in Vitro.** Briefly, the prepared 3D DNA walker was dispersed in 25 mM Tris-HCl buffer containing 137 mM NaCl (pH=5.5) as a concentration of 30 µg/mL. 100 µL of the AuNPs@ZIF-8 solution were incubated with different concentrations of miRNA-10b (5 µL) at 37 °C for 2 h. The fluorescence spectra were scanned with excitation wavelengths of 490 nm. To investigate the specificity, other miRNAs (100 nM) were used to replace miRNA-10b target for the same experimental process.

**PAGE electrophoresis.** First, 10 mL of 30% acrylamide/bis-acrylamide gel solution at the molar ratio of 29 : 1, 5 mL of 5×Tris–borate–EDTA (TBE) buffer (450 mM Tris, 450 mM boric acid, and 10 mM EDTA, pH 8.0), 0.18 mL of 10% APS, 0.016 mL of TEMED and 9.8 mL ultrapure water were mixed for the preparation of the hydrogel at room temperature. After 30 min, the gel was soaked in 1×TBE buffer (pH 8.0). Furthermore, 12 µL different samples were mixed with 2 µL loading buffer and transferred to the prepared 12% native poly-acrylamide gel for electrophoresis. The PAGE electrophoresis was operated in 1×TBE buffer at the voltage of 170 V for 5 min and 110 V for about 45 min. Finally, the gels were stained with diluted 4S Red Plus for 10 min and further investigated by gel imaging system.

**ICP-MS.** 1 mg AuNPs@ZIF-8 were dispersed with 1 mL of 100 mM HEPES buffer (pH 7.4 or 5.5) for different period of time. Afterwards, the mixture was first centrifuged at 10000 rpm for 10 min. and then diluted to 1:2500 with ultrapure water for further investigation. Besides, HeLa cells (~5.62×10<sup>4</sup> cells) were incubated with 1 mL of RPMI-1640 containing 10 µg mL<sup>-1</sup> AuNPs@ZIF-8 for 3 h at 37 °C. The cells were further collected and lysed by 200 µL of cell lysate, and were 1:50 diluted using ultrapure water. Finally, the ICP-MS was performed to determine the content of Zn<sup>2+</sup> in one cell. The Zn<sup>2+</sup> concentration in HeLa cells with or without treatment of AuNPs@ZIF-8 was calculated to be about 18.25 mM and 0.08 mM.

**Cell Culture.** MDA-MB-231 (Human metastatic breast cancer cells) and MCF-7 cells (Human non-metastatic breast cancer cells) were expanded in the growth media (DMEM containing 1% Gln, 10% FBS and 1% ) in a 5% CO<sub>2</sub> humidified incubator at 37 °C. The culture solution was replaced every 48 h. The cells were cultured until 80–90% confluence for further use.

**Cell Viability Assay.** The cell viability assays were implemented in the light of MTT assay as standard protocol. MDA-MB-231 and MCF-7 cells (5×10<sup>5</sup> cells/well) were seeded in a 96 well microplate and cultivated in DMEM overnight under 5% CO<sub>2</sub> at 37 °C. Furthermore, different concentrations of 3D DNA walker were introduced and co-incubated with cells for 24 h under the same conditions. After that, 10 µL MTT solution (5 mg/mL) in PBS was incubated for 2 h to form formazan. The medium was aspirated and replaced with 100 µL DMSO in each well to dissolve the formazan salt. The whole experiments were repeated three times. The percentage of cell viability of the control was suggested as 100%.

**Cell Staining and Imaging.** Two types of cells (MCF-7 and MDA-MD-231) were seeded into Laser confocal special dishes (5×10<sup>5</sup> cells/well) under 5% CO<sub>2</sub> at 37 °C and then cultured overnight to get adhesion. Furthermore, the cells were co-incubated with 3D DNA walker (30 µg/mL) for 0.5 to 8 h. After that, the cells were rinsed with PBS for 3 times and fixed by 4% paraformaldehyde at room temperature for ten minutes. Finally, the cell nuclei were stained with 4,6-diamidino-2-phenylindole (DAPI) (1 µg/mL) in PBS for ten min and further rinsed with PBS for 3 times. Similarly, MDA-MB-231 cells were incubated with 3D DNA walker under the same conditions and then co-stained with lyso@tracker (75 nM) for 2 h.

To regulate the miRNA-10b expression level in the living cells, MDA-MB-231 cells were first transfected with 10 µL of MicrONhsa-miR-10b-5p mimic or MicrOFFhsa-miR-10b-5p inhibitor or (0.2 mM) in 1 mL culture medium at 37 °C for 24 h. Then the cells were incubated with 1 mL culture solution containing 30 µg/mL 3D DNA walker at 37 °C for 6 h. All fluorescence images were obtained by a confocal laser scanning microscope and flow cytometry was used to detect the fluorescence intensity versus counts of cells.

## S2. Figures and tables

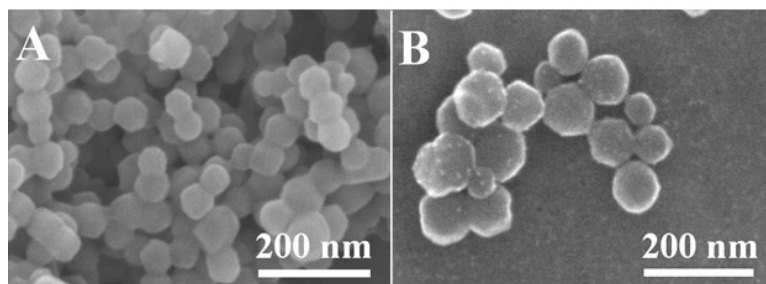

Figure S1. SEM images of ZIF-8 (A) and AuNPs@ZIF-8 (B).

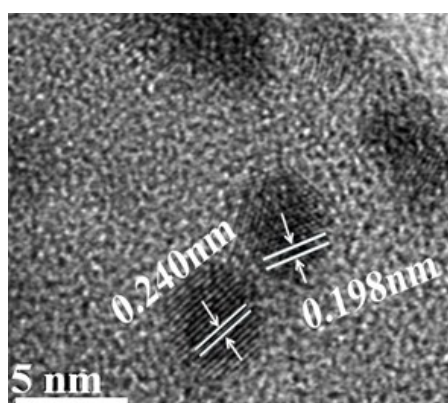

Figure S2. HRTEM of AuNPs@ZIF-8.

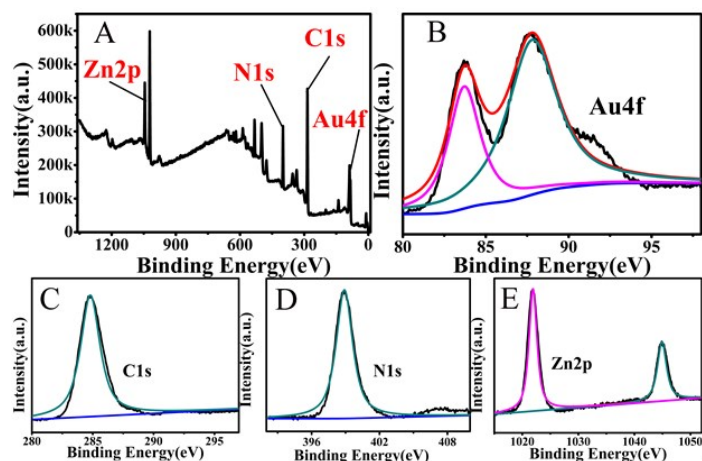

Figure S3. XPS spectra of AuNPs@ZIF-8: survey spectrum (A); Au 4f (B); C1s (C); N1s (D); Zn2p (E).

The surface elemental compositions and valence states of the prepared samples were determined by X-ray photoelectron spectroscopy (XPS) technology. The XPS survey spectrum in **Figure S3** exhibits evidence that element Au, C, N and Zn are indeed in the hybrid AuNPs@ZIF-8 which coincides with the observation from TEM-mapping, further verifying the successful preparation of AuNPs@ZIF-8.

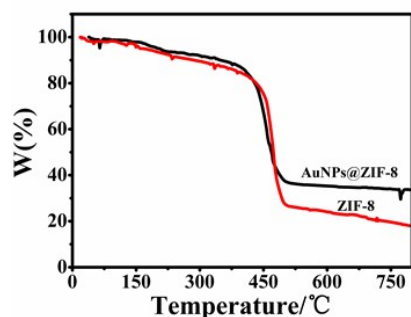

**Figure S4.** Thermogravimetric analysis (TGA) analysis of AuNPs@ZIF-8 and ZIF-8.

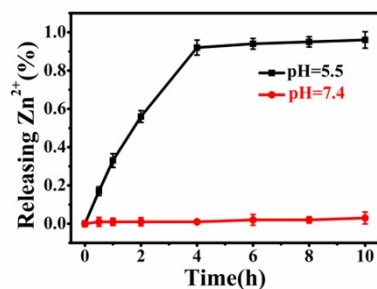

**Figure S5.** The proportion of released Zn<sup>2+</sup> with time at pH 5.5 and pH 7.4.

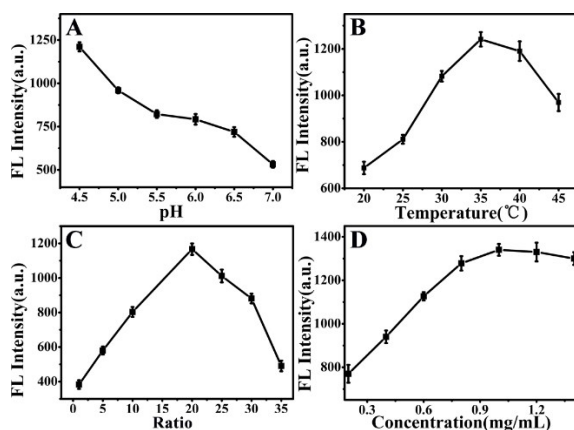

**Figure S6.** Effects of pH (A); incubation temperature (B); ratio of substrate stand to DNAzyme walking stand (C) and the concentration of the AuNPs@ZIF-8 (D) on the response of miRNA initiated 3D DNA walker.

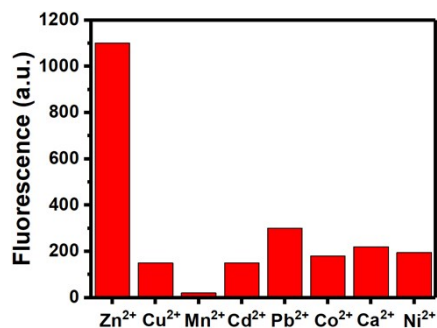

**Figure S7.** The selectivity of the system response to different divalent metal ions.

Under the same experiment in the presence of 10 nM miR-10b with other divalent metal ions, the fluorescence of the DNA/Au NPs has no obvious change towards other different divalent metal ions except Zn<sup>2+</sup>, which demonstrated the high specificity of the system towards Zn<sup>2+</sup>.<sup>2,3,4</sup>

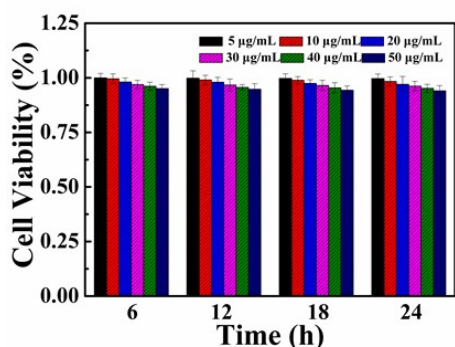

**Figure S8.** MTT assay of cytotoxicity for the 3D DNA walker in MDA-MB-231 cells. MDA-MB-231 cells were treated with different concentrations (5, 10, 20, 30, 40 and 50 µg/mL) of 3D DNA walker for 6, 12, 18 and 24 h, respectively. It showed the 3D DNA walker had slight toxicity to the cells even at 50 µg/mL after 24 h incubation with the cell viability decreased by ~9%.

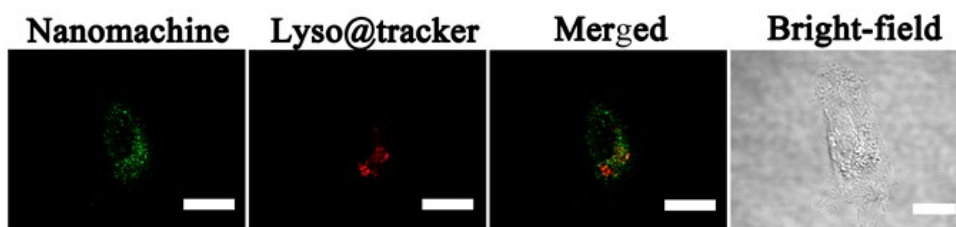

**Figure S9.** Fluorescence images for co-localization analysis with lysosome in MDA-MB-231 cells. MDA-MB-231 cells were incubated with 30 µg/mL DNA walker, and then treated with 75 nM lyso@tracker.

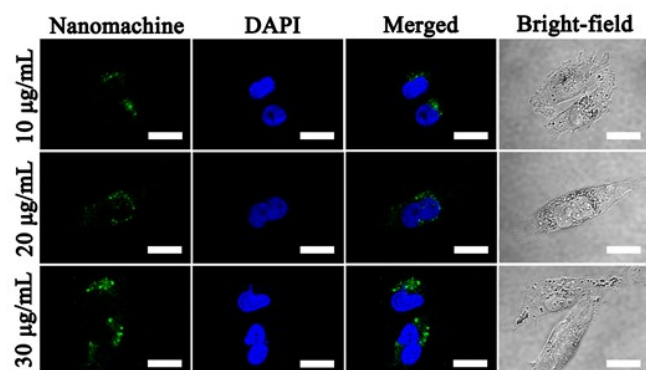

**Figure S10.** Fluorescence images of the MDA-MB-231 cells treated with different concentrations of the 3D DNA walker (10, 20, and 30 µg/mL) for 2 h.

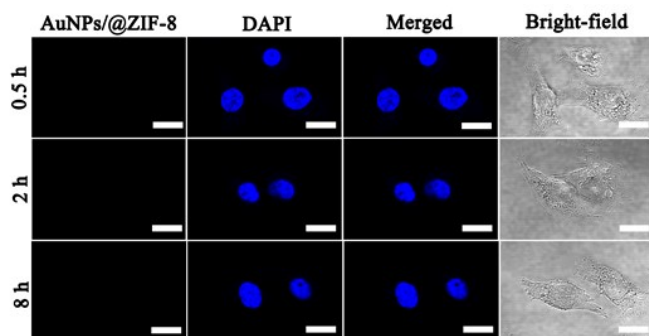

**Figure S11.** Fluorescence images of the MDA-MB-231 cells treated with 30 µg/mL AuNPs@ZIF-8 for different time.

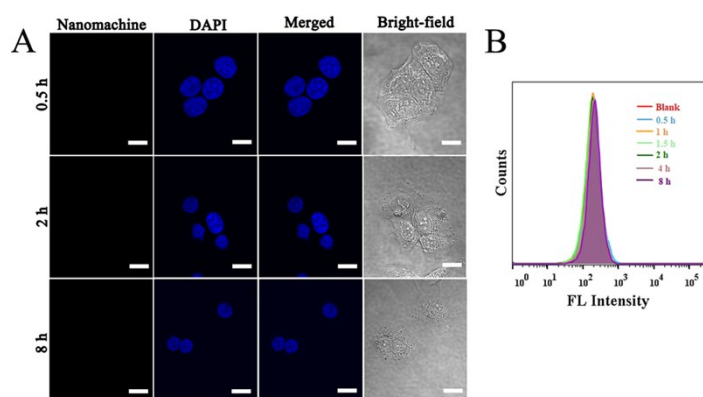

**Figure S12.** Fluorescence images of the MCF-7 cells treated with 30 µg/mL 3D DNA walker for different time (A) and the corresponding flow cytometry analysis (B).

| Method                                          | Driving Force                        | Linear Range  | LOD     | Ref.         |
|-------------------------------------------------|--------------------------------------|---------------|---------|--------------|
| DNAzyme-based<br>ratiometric fluorescence       | Zn <sup>2+</sup> -DNAzyme            | 2 to 60 nM    | 0.68 nM | [5]          |
| Highly Integrated DNA<br>Motor                  | Mn <sup>2+</sup> -DNAzyme            | 2.5 to 20 nM  | 1.2 nM  | [6]          |
| Entropy-driven DNA<br>nanomachine               | Toehold-assisted<br>branch migration | 20pM to 10 nM | 8 pM    | [7]          |
| gold nanoparticle loaded<br>split-DNAzyme probe | Mg <sup>2+</sup> -DNAzyme            | 0 to 1nM      | 10 pM   | [8]          |
| 3D DNA Walker                                   | Zn <sup>2+</sup> -DNAzyme            | 0.1 to 100 nM | 34pM    | This<br>work |

**Table S1.** Comparison of the present 3D DNA walker for miRNA detection with other DNA walkers.

### S3. References

- (1) Tong, Y.; Xue, G.; Wang, H.; Liu, M.; Wang, J.; Hao, C.; Zhang, X.; Wang, D.; Shi, X.; Liu, W.; Li, G.; Tang, Z. *Nanoscale*, **2018**, *10*, 16425.
- (2) Li, J.; Zheng, W.; Kwon, A. H.; Lu, Y. *Nucleic Acids Res.* **2000**, *28* (2), 481.
- (3) Li, J.; Lu, Y. A. *J. Am. Chem. Soc.* **2000**, *122* (42), 10466.
- (4) Yang, Z.; Loh, K. Y.; Chu, Y.-T.; Feng, R.; Satyavolu, N. S. R.; Xiong, M.; Nakamata Huynh, S. M.; Hwang, K.; Li, L.; Xing, H.; Zhang, X.; Chemla, Y. R.; Gruebele, M.; Lu, Y. *J. Am. Chem. Soc.* **2018**, *140* (50), 17656.
- (5) Yi, J. T.; Chen, T. T.; Huo, J.; Chu, X. *Anal. Chem.* **2017**, *89*, 12351.
- (6) Wang, J.; Wang, D. X.; Tang, A. N.; Kong, D. M. *Anal. Chem.* **2019**, *91*, 5244.
- (7) Liang, C. P.; Ma, P. Q.; Liu, H.; Guo, X.; Yin, B. C.; Ye, B. C. *Angew. Chem. Int. Ed.* **2017**, *56*, 9077.
- (8) Wu, Y.; Huang, J.; Yang, X.; Yang, Y.; Quan, K.; Xie, N.; Li, J.; Ma, C.; Wang, K. *Anal. Chem.* **2017**, *89*, 8377.
